# Supplementary material for: Effect of Prenatal Docosahexaenoic Acid Supplementation on Blood Pressure in Children With Overweight Condition or Obesity: A Secondary Analysis of a Randomized Clinical Trial
Source: PubMed Central journal article supplement (PMC6484605; doi:10.1001/jamanetworkopen.2019.0088), 2019-02-22
Supplement: jamanetwopen-2-e190088-s002.pdf [file jamanetwopen-2-e190088-s002.pdf]

## Supplementary Online Content

Kerling EH, Hilton JM, Thodosoff JM, Wick J, Colombo J, Carlson SE. Effect of prenatal docosahexaenoic acid supplementation on blood pressure in children with overweight condition or obesity: a secondary analysis of a randomized clinical trial. *JAMA Netw Open*. 2019;2(2):e190088. doi:10.1001/jamanetworkopen.2019.0088

**eTable.** Number of Completed Visits and Number and Percent of Usable Blood Pressure Assessments by Group and Age

This supplementary material has been provided by the authors to give readers additional information about their work.

**eTable.** Number of Completed Visits and Number and Percent of Usable Blood Pressure Assessments by Group and Age

| Age       | Completed Visits |     | Usable Blood Pressure Assessment |         |
|-----------|------------------|-----|----------------------------------|---------|
|           | Placebo          | DHA | Placebo                          | DHA     |
|           | No.              | No. | No.(%)                           | No.(%)  |
| 4 years   | 87               | 92  | 70 (80)                          | 82 (89) |
| 4.5 years | 86               | 91  | 80 (93)                          | 83 (91) |
| 5 years   | 83               | 88  | 76 (92)                          | 81 (92) |
| 5.5 years | 81               | 86  | 77 (95)                          | 83 (97) |
| 6.0 years | 81               | 75  | 76 (94)                          | 82 (98) |
