# Supplementary material for: Effect of Prenatal Docosahexaenoic Acid Supplementation on Blood Pressure in Children With Overweight Condition or Obesity: A Secondary Analysis of a Randomized Clinical Trial
Source: PubMed Central journal article supplement (PMC6484605; doi:10.1001/jamanetworkopen.2019.0088), 2019-02-22
Supplement: jamanetwopen-2-e190088-s003.pdf [file jamanetwopen-2-e190088-s003.pdf]

## Data Sharing Statement

Kerling. Effect of Prenatal Docosahexaenoic Acid Supplementation on Blood Pressure in Children With Overweight Condition or Obesity.

*JAMA Netw Open*. Published February 22, 2019.

10.1001/jamanetworkopen.2019.0088

### Data

**Data available:** Yes

**Data types:** Deidentified participant data

**How to access data:** [scarlson@kumc.edu](mailto:scarlson@kumc.edu)

**When available:** With publication

### Supporting Documents

**Document types:** None

### Additional Information

**Who can access the data:** Researchers whose proposed use of the data have been approved

**Types of analyses:** Any research purpose or for meta-analyses

**Mechanisms of data availability:** without support but after approval

**Any additional restrictions:** None
